# Supplementary material for: Testing the near field/far field model performance for prediction of particulate matter emissions in a paint factory
Source: Royal Society of Chemistry journal article supplement (doi:10.1039/c4em00532e), 2014-11-06
Supplement: c4em00532e1.pdf [file c4em00532e1.pdf]

## ART REPORT **1** – Paint factory day 1 – 06-Aug-14

### Pouring process

#### Chemical details

|          |            |
|----------|------------|
| Chemical | TiO2 RD3   |
| CAS No.  | 13463-67-7 |

#### Scenario details

|                           |     |
|---------------------------|-----|
| Number of activities      | 3   |
| Total duration (mins)     | 176 |
| Nonexposure period (mins) | 112 |

#### Metadata

|                  |                        |
|------------------|------------------------|
| ART version      | 1.5                    |
| Creator          | joonas.koivisto@ttl.fi |
| Date created     | 08-Jul-14              |
| Date last edited | 06-Aug-14              |

### Details for Activity BB TiO2 RD3 (4x500kg)

Emission sources:      Near field ✓  
                                 Far field

Duration (mins):                      20

#### Near-field exposure

##### *Operational Conditions*

| <i>Substance emission potential</i> |                                          |
|-------------------------------------|------------------------------------------|
| Substance product type              | Powders, granules or pelletised material |
| Dustiness                           | 5.318 mg/kg for inhalable fraction       |
| Moisture content                    | Dry product (< 5 % moisture content)     |
| Powder weight fraction              | 1                                        |

| <i>Activity emission potential</i> |                                   |
|------------------------------------|-----------------------------------|
| Activity class                     | Falling powders                   |
| Situation                          | Transferring 100 – 1000 kg/minute |
| Handling type                      | Routine transfer                  |
| Drop height                        | Drop height > 0.5 m               |
| Containment level                  | Open process                      |

| <i>Surface contamination</i>               |     |
|--------------------------------------------|-----|
| Process fully enclosed?                    | No  |
| Effective housekeeping practices in place? | Yes |

| <i>Dispersion</i> |                     |
|-------------------|---------------------|
| Work area         | Indoors             |
| Room size         | 3000 m <sup>3</sup> |

##### *Risk Management Measures*

| <i>Localised controls</i> |                                           |
|---------------------------|-------------------------------------------|
| Primary                   | Low level containment (90.00 % reduction) |
| Secondary                 | No localized controls (0.00 % reduction)  |

| <i>Dispersion</i> |                              |
|-------------------|------------------------------|
| Ventilation rate  | 3 air changes per hour (ACH) |

Details for Activity SB 260 kg TiO2 RD3

Emission sources:      Near field   
                                  Far field

Duration (mins):                      23

Near-field exposure

*Operational Conditions*

*Substance emission potential*

|                        |                                          |
|------------------------|------------------------------------------|
| Substance product type | Powders, granules or pelletised material |
| Dustiness              | 5.318 mg/kg for inhalable fraction       |
| Moisture content       | Dry product (< 5 % moisture content)     |
| Powder weight fraction | 1                                        |

*Activity emission potential*

|                   |                                 |
|-------------------|---------------------------------|
| Activity class    | Falling powders                 |
| Situation         | Transferring 10 – 100 kg/minute |
| Handling type     | Routine transfer                |
| Drop height       | Drop height > 0.5 m             |
| Containment level | Open process                    |

*Surface contamination*

|                                            |     |
|--------------------------------------------|-----|
| Process fully enclosed?                    | No  |
| Effective housekeeping practices in place? | Yes |

*Dispersion*

|           |                     |
|-----------|---------------------|
| Work area | Indoors             |
| Room size | 3000 m <sup>3</sup> |

*Risk Management Measures*

*Localised controls*

|           |                                          |
|-----------|------------------------------------------|
| Primary   | No localized controls (0.00 % reduction) |
| Secondary | No localized controls (0.00 % reduction) |

*Dispersion*

|                  |                              |
|------------------|------------------------------|
| Ventilation rate | 3 air changes per hour (ACH) |
|------------------|------------------------------|

Details for Activity SB 422 kg Micro Mica

Emission sources:      Near field    
                                  Far field

Duration (mins):                      21

Near-field exposure

*Operational Conditions*

*Substance emission potential*

|                        |                                          |
|------------------------|------------------------------------------|
| Substance product type | Powders, granules or pelletised material |
| Dustiness              | 22.352 mg/kg for inhalable fraction      |
| Moisture content       | Dry product (< 5 % moisture content)     |
| Powder weight fraction | 1                                        |

*Activity emission potential*

|                   |                                 |
|-------------------|---------------------------------|
| Activity class    | Falling powders                 |
| Situation         | Transferring 10 – 100 kg/minute |
| Handling type     | Routine transfer                |
| Drop height       | Drop height > 0.5 m             |
| Containment level | Open process                    |

*Surface contamination*

|                                            |     |
|--------------------------------------------|-----|
| Process fully enclosed?                    | No  |
| Effective housekeeping practices in place? | Yes |

*Dispersion*

|           |                     |
|-----------|---------------------|
| Work area | Indoors             |
| Room size | 3000 m <sup>3</sup> |

*Risk Management Measures*

*Localised controls*

|           |                                          |
|-----------|------------------------------------------|
| Primary   | No localized controls (0.00 % reduction) |
| Secondary | No localized controls (0.00 % reduction) |

*Dispersion*

|                  |                              |
|------------------|------------------------------|
| Ventilation rate | 3 air changes per hour (ACH) |
|------------------|------------------------------|

## Predicted exposure levels

ART predicts air concentrations in a worker's personal breathing zone outside of any Respiratory Protection Equipment (RPE). The use of RPE must be considered separately.

### Mechanistic model results

The predicted 75th percentile full-shift exposure is 0.77 mg/m<sup>3</sup>.

The inter-quartile confidence interval is 0.41 mg/m<sup>3</sup> to 1.5 mg/m<sup>3</sup>.

## ART REPORT 2 – Paint factory, day 2 – 06-Aug-14

### Pouring process

#### Chemical details

|          |            |
|----------|------------|
| Chemical | TiO2 TR92  |
| CAS No.  | 13463-67-7 |

#### Scenario details

|                           |     |
|---------------------------|-----|
| Number of activities      | 4   |
| Total duration (mins)     | 272 |
| Nonexposure period (mins) | 186 |

#### Metadata

|                  |                        |
|------------------|------------------------|
| ART version      | 1.5                    |
| Creator          | joonas.koivisto@ttl.fi |
| Date created     | 15-Jul-14              |
| Date last edited | 15-Jul-14              |

Details for Activity BB 5x500 TiO2 TR92

Emission sources:      Near field    
                                  Far field

Duration (mins):                      26

Near-field exposure

*Operational Conditions*

| <i>Substance emission potential</i> |                                          |
|-------------------------------------|------------------------------------------|
| Substance product type              | Powders, granules or pelletised material |
| Dustiness                           | 1.577 mg/kg for inhalable fraction       |
| Moisture content                    | Dry product (< 5 % moisture content)     |
| Powder weight fraction              | 1                                        |

| <i>Activity emission potential</i> |                                   |
|------------------------------------|-----------------------------------|
| Activity class                     | Falling powders                   |
| Situation                          | Transferring 100 – 1000 kg/minute |
| Handling type                      | Routine transfer                  |
| Drop height                        | Drop height > 0.5 m               |
| Containment level                  | Open process                      |

| <i>Surface contamination</i>               |     |
|--------------------------------------------|-----|
| Process fully enclosed?                    | No  |
| Effective housekeeping practices in place? | Yes |

| <i>Dispersion</i> |                     |
|-------------------|---------------------|
| Work area         | Indoors             |
| Room size         | 3000 m <sup>3</sup> |

*Risk Management Measures*

| <i>Localised controls</i> |                                           |
|---------------------------|-------------------------------------------|
| Primary                   | Low level containment (90.00 % reduction) |
| Secondary                 | No localized controls (0.00 % reduction)  |

| <i>Dispersion</i> |                              |
|-------------------|------------------------------|
| Ventilation rate  | 3 air changes per hour (ACH) |

Details for Activity SB 407 kg Satintone

Emission sources: Near field    
 Far field

Duration (mins): 31

Near-field exposure

*Operational Conditions*

*Substance emission potential*

|                        |                                          |
|------------------------|------------------------------------------|
| Substance product type | Powders, granules or pelletised material |
| Dustiness              | 2.44 mg/kg for inhalable fraction        |
| Moisture content       | Dry product (< 5 % moisture content)     |
| Powder weight fraction | 1                                        |

*Activity emission potential*

|                   |                                 |
|-------------------|---------------------------------|
| Activity class    | Falling powders                 |
| Situation         | Transferring 10 – 100 kg/minute |
| Handling type     | Routine transfer                |
| Drop height       | Drop height > 0.5 m             |
| Containment level | Open process                    |

*Surface contamination*

|                                            |     |
|--------------------------------------------|-----|
| Process fully enclosed?                    | No  |
| Effective housekeeping practices in place? | Yes |

*Dispersion*

|           |                     |
|-----------|---------------------|
| Work area | Indoors             |
| Room size | 3000 m <sup>3</sup> |

*Risk Management Measures*

*Localised controls*

|           |                                          |
|-----------|------------------------------------------|
| Primary   | No localized controls (0.00 % reduction) |
| Secondary | No localized controls (0.00 % reduction) |

*Dispersion*

|                  |                              |
|------------------|------------------------------|
| Ventilation rate | 3 air changes per hour (ACH) |
|------------------|------------------------------|



Details for Activity SB 275 kg Microdol

Emission sources:      Near field    
                                  Far field

Duration (mins):                      10

Near-field exposure

*Operational Conditions*

*Substance emission potential*

|                        |                                          |
|------------------------|------------------------------------------|
| Substance product type | Powders, granules or pelletised material |
| Dustiness              | 12.131 mg/kg for inhalable fraction      |
| Moisture content       | Dry product (< 5 % moisture content)     |
| Powder weight fraction | 1                                        |

*Activity emission potential*

|                   |                                 |
|-------------------|---------------------------------|
| Activity class    | Falling powders                 |
| Situation         | Transferring 10 – 100 kg/minute |
| Handling type     | Routine transfer                |
| Drop height       | Drop height > 0.5 m             |
| Containment level | Open process                    |

*Surface contamination*

|                                            |     |
|--------------------------------------------|-----|
| Process fully enclosed?                    | No  |
| Effective housekeeping practices in place? | Yes |

*Dispersion*

|           |                     |
|-----------|---------------------|
| Work area | Indoors             |
| Room size | 3000 m <sup>3</sup> |

*Risk Management Measures*

*Localised controls*

|           |                                          |
|-----------|------------------------------------------|
| Primary   | No localized controls (0.00 % reduction) |
| Secondary | No localized controls (0.00 % reduction) |

*Dispersion*

|                  |                              |
|------------------|------------------------------|
| Ventilation rate | 3 air changes per hour (ACH) |
|------------------|------------------------------|

Details for Activity BB 2x500 kg Microdol

Emission sources: Near field   
Far field

Duration (mins): 19

Near-field exposure

*Operational Conditions*

*Substance emission potential*

|                        |                                          |
|------------------------|------------------------------------------|
| Substance product type | Powders, granules or pelletised material |
| Dustiness              | 12.131 mg/kg for inhalable fraction      |
| Moisture content       | Dry product (< 5 % moisture content)     |
| Powder weight fraction | 1                                        |

*Activity emission potential*

|                   |                                   |
|-------------------|-----------------------------------|
| Activity class    | Falling powders                   |
| Situation         | Transferring 100 – 1000 kg/minute |
| Handling type     | Routine transfer                  |
| Drop height       | Drop height > 0.5 m               |
| Containment level | Open process                      |

*Surface contamination*

|                                            |     |
|--------------------------------------------|-----|
| Process fully enclosed?                    | No  |
| Effective housekeeping practices in place? | Yes |

*Dispersion*

|           |                     |
|-----------|---------------------|
| Work area | Indoors             |
| Room size | 3000 m <sup>3</sup> |

*Risk Management Measures*

*Localised controls*

|           |                                           |
|-----------|-------------------------------------------|
| Primary   | Low level containment (90.00 % reduction) |
| Secondary | No localized controls (0.00 % reduction)  |

*Dispersion*

|                  |                              |
|------------------|------------------------------|
| Ventilation rate | 3 air changes per hour (ACH) |
|------------------|------------------------------|

## Predicted exposure levels

ART predicts air concentrations in a worker's personal breathing zone outside of any Respiratory Protection Equipment (RPE). The use of RPE must be considered separately.

### Mechanistic model results

The predicted 75th percentile full-shift exposure is 0.55 mg/m<sup>3</sup>.

The inter-quartile confidence interval is 0.29 mg/m<sup>3</sup> to 1.1 mg/m<sup>3</sup>.

# ART REPORT **3** – **BB RD3** – 06-Aug-14

## Pouring process

### Chemical details

|          |            |
|----------|------------|
| Chemical | TiO2 RD3   |
| CAS No.  | 13463-67-7 |

### Scenario details

|                           |    |
|---------------------------|----|
| Number of activities      | 1  |
| Total duration (mins)     | 20 |
| Nonexposure period (mins) | 0  |

### Metadata

|                  |                        |
|------------------|------------------------|
| ART version      | 1.5                    |
| Creator          | joonas.koivisto@ttl.fi |
| Date created     | 08-Jul-14              |
| Date last edited | 06-Aug-14              |

Details for Activity BB TiO2 RD3 (4x500kg)

Emission sources:      Near field   
                                 Far field

Duration (mins):                      20

Near-field exposure

*Operational Conditions*

| <i>Substance emission potential</i> |                                          |
|-------------------------------------|------------------------------------------|
| Substance product type              | Powders, granules or pelletised material |
| Dustiness                           | 5.318 mg/kg for inhalable fraction       |
| Moisture content                    | Dry product (< 5 % moisture content)     |
| Powder weight fraction              | 1                                        |

| <i>Activity emission potential</i> |                                   |
|------------------------------------|-----------------------------------|
| Activity class                     | Falling powders                   |
| Situation                          | Transferring 100 – 1000 kg/minute |
| Handling type                      | Routine transfer                  |
| Drop height                        | Drop height > 0.5 m               |
| Containment level                  | Open process                      |

| <i>Surface contamination</i>               |     |
|--------------------------------------------|-----|
| Process fully enclosed?                    | No  |
| Effective housekeeping practices in place? | Yes |

| <i>Dispersion</i> |                     |
|-------------------|---------------------|
| Work area         | Indoors             |
| Room size         | 3000 m <sup>3</sup> |

*Risk Management Measures*

| <i>Localised controls</i> |                                           |
|---------------------------|-------------------------------------------|
| Primary                   | Low level containment (90.00 % reduction) |
| Secondary                 | No localized controls (0.00 % reduction)  |

| <i>Dispersion</i> |                              |
|-------------------|------------------------------|
| Ventilation rate  | 3 air changes per hour (ACH) |

## Predicted exposure levels

ART predicts air concentrations in a worker's personal breathing zone outside of any Respiratory Protection Equipment (RPE). The use of RPE must be considered separately.

### Mechanistic model results

The predicted 75th percentile full-shift exposure is 0.9 mg/m<sup>3</sup>.

The inter-quartile confidence interval is 0.47 mg/m<sup>3</sup> to 1.7 mg/m<sup>3</sup>.

# ART REPORT 4 – BB TR92 – 06-Aug-14

## Pouring process

### Chemical details

|          |            |
|----------|------------|
| Chemical | TiO2 TR92  |
| CAS No.  | 13463-67-7 |

### Scenario details

|                           |    |
|---------------------------|----|
| Number of activities      | 1  |
| Total duration (mins)     | 26 |
| Nonexposure period (mins) | 0  |

### Metadata

|                  |                        |
|------------------|------------------------|
| ART version      | 1.5                    |
| Creator          | joonas.koivisto@ttl.fi |
| Date created     | 15-Jul-14              |
| Date last edited | 06-Aug-14              |

Details for Activity BB 5x500 TiO2 TR92

Emission sources:      Near field    
                                  Far field

Duration (mins):                      26

Near-field exposure

*Operational Conditions*

*Substance emission potential*

|                        |                                          |
|------------------------|------------------------------------------|
| Substance product type | Powders, granules or pelletised material |
| Dustiness              | 1.577 mg/kg for inhalable fraction       |
| Moisture content       | Dry product (< 5 % moisture content)     |
| Powder weight fraction | 1                                        |

*Activity emission potential*

|                   |                                   |
|-------------------|-----------------------------------|
| Activity class    | Falling powders                   |
| Situation         | Transferring 100 – 1000 kg/minute |
| Handling type     | Routine transfer                  |
| Drop height       | Drop height > 0.5 m               |
| Containment level | Open process                      |

*Surface contamination*

|                                            |     |
|--------------------------------------------|-----|
| Process fully enclosed?                    | No  |
| Effective housekeeping practices in place? | Yes |

*Dispersion*

|           |                     |
|-----------|---------------------|
| Work area | Indoors             |
| Room size | 3000 m <sup>3</sup> |

*Risk Management Measures*

*Localised controls*

|           |                                           |
|-----------|-------------------------------------------|
| Primary   | Low level containment (90.00 % reduction) |
| Secondary | No localized controls (0.00 % reduction)  |

*Dispersion*

|                  |                              |
|------------------|------------------------------|
| Ventilation rate | 3 air changes per hour (ACH) |
|------------------|------------------------------|



## Predicted exposure levels

ART predicts air concentrations in a worker's personal breathing zone outside of any Respiratory Protection Equipment (RPE). The use of RPE must be considered separately.

### Mechanistic model results

The predicted 75th percentile full-shift exposure is 0.89 mg/m<sup>3</sup>.

The inter-quartile confidence interval is 0.47 mg/m<sup>3</sup> to 1.7 mg/m<sup>3</sup>.

# ART REPORT 5 – BB Microdol – 06-Aug-14

## Pouring process

### Chemical details

|          |          |
|----------|----------|
| Chemical | Microdol |
| CAS No.  |          |

### Scenario details

|                           |    |
|---------------------------|----|
| Number of activities      | 1  |
| Total duration (mins)     | 19 |
| Nonexposure period (mins) | 0  |

### Metadata

|                  |                        |
|------------------|------------------------|
| ART version      | 1.5                    |
| Creator          | joonas.koivisto@ttl.fi |
| Date created     | 15-Jul-14              |
| Date last edited | 06-Aug-14              |

Details for Activity BB 2x500 kg Microdol

Emission sources:      Near field    
                                  Far field

Duration (mins):                      19

Near-field exposure

*Operational Conditions*

| <i>Substance emission potential</i> |                                          |
|-------------------------------------|------------------------------------------|
| Substance product type              | Powders, granules or pelletised material |
| Dustiness                           | 12.131 mg/kg for inhalable fraction      |
| Moisture content                    | Dry product (< 5 % moisture content)     |
| Powder weight fraction              | 1                                        |

| <i>Activity emission potential</i> |                                   |
|------------------------------------|-----------------------------------|
| Activity class                     | Falling powders                   |
| Situation                          | Transferring 100 – 1000 kg/minute |
| Handling type                      | Routine transfer                  |
| Drop height                        | Drop height > 0.5 m               |
| Containment level                  | Open process                      |

| <i>Surface contamination</i>               |     |
|--------------------------------------------|-----|
| Process fully enclosed?                    | No  |
| Effective housekeeping practices in place? | Yes |

| <i>Dispersion</i> |                     |
|-------------------|---------------------|
| Work area         | Indoors             |
| Room size         | 3000 m <sup>3</sup> |

*Risk Management Measures*

| <i>Localised controls</i> |                                           |
|---------------------------|-------------------------------------------|
| Primary                   | Low level containment (90.00 % reduction) |
| Secondary                 | No localized controls (0.00 % reduction)  |

| <i>Dispersion</i> |                              |
|-------------------|------------------------------|
| Ventilation rate  | 3 air changes per hour (ACH) |

## Predicted exposure levels

ART predicts air concentrations in a worker's personal breathing zone outside of any Respiratory Protection Equipment (RPE). The use of RPE must be considered separately.

### Mechanistic model results

The predicted 75th percentile full-shift exposure is 0.89 mg/m<sup>3</sup>.

The inter-quartile confidence interval is 0.47 mg/m<sup>3</sup> to 1.7 mg/m<sup>3</sup>.

# ART REPORT **6** – **SB RD3** – 06-Aug-14

## Pouring process

### Chemical details

|          |            |
|----------|------------|
| Chemical | TiO2 RD3   |
| CAS No.  | 13463-67-7 |

### Scenario details

|                           |    |
|---------------------------|----|
| Number of activities      | 1  |
| Total duration (mins)     | 23 |
| Nonexposure period (mins) | 0  |

### Metadata

|                  |                        |
|------------------|------------------------|
| ART version      | 1.5                    |
| Creator          | joonas.koivisto@ttl.fi |
| Date created     | 08-Jul-14              |
| Date last edited | 06-Aug-14              |

Details for Activity SB 260 kg TiO2 RD3

Emission sources:      Near field   
                                  Far field

Duration (mins):                      23

Near-field exposure

*Operational Conditions*

*Substance emission potential*

|                        |                                          |
|------------------------|------------------------------------------|
| Substance product type | Powders, granules or pelletised material |
| Dustiness              | 5.318 mg/kg for inhalable fraction       |
| Moisture content       | Dry product (< 5 % moisture content)     |
| Powder weight fraction | 1                                        |

*Activity emission potential*

|                   |                                 |
|-------------------|---------------------------------|
| Activity class    | Falling powders                 |
| Situation         | Transferring 10 – 100 kg/minute |
| Handling type     | Routine transfer                |
| Drop height       | Drop height > 0.5 m             |
| Containment level | Open process                    |

*Surface contamination*

|                                            |     |
|--------------------------------------------|-----|
| Process fully enclosed?                    | No  |
| Effective housekeeping practices in place? | Yes |

*Dispersion*

|           |                     |
|-----------|---------------------|
| Work area | Indoors             |
| Room size | 3000 m <sup>3</sup> |

*Risk Management Measures*

*Localised controls*

|           |                                          |
|-----------|------------------------------------------|
| Primary   | No localized controls (0.00 % reduction) |
| Secondary | No localized controls (0.00 % reduction) |

*Dispersion*

|                  |                              |
|------------------|------------------------------|
| Ventilation rate | 3 air changes per hour (ACH) |
|------------------|------------------------------|

## Predicted exposure levels

ART predicts air concentrations in a worker's personal breathing zone outside of any Respiratory Protection Equipment (RPE). The use of RPE must be considered separately.

### Mechanistic model results

The predicted 75th percentile full-shift exposure is 2.7 mg/m<sup>3</sup>.

The inter-quartile confidence interval is 1.4 mg/m<sup>3</sup> to 5.1 mg/m<sup>3</sup>.

# ART REPORT 7 – SB Micro Mica – 06-Aug-14

## Pouring process

### Chemical details

|          |            |
|----------|------------|
| Chemical | Micro Mica |
| CAS No.  |            |

### Scenario details

|                           |    |
|---------------------------|----|
| Number of activities      | 1  |
| Total duration (mins)     | 21 |
| Nonexposure period (mins) | 0  |

### Metadata

|                  |                        |
|------------------|------------------------|
| ART version      | 1.5                    |
| Creator          | joonas.koivisto@ttl.fi |
| Date created     | 08-Jul-14              |
| Date last edited | 06-Aug-14              |



Details for Activity SB 422 kg Micro Mica

Emission sources: Near field   
 Far field

Duration (mins): 21

Near-field exposure

*Operational Conditions*

*Substance emission potential*

|                        |                                          |
|------------------------|------------------------------------------|
| Substance product type | Powders, granules or pelletised material |
| Dustiness              | 22.352 mg/kg for inhalable fraction      |
| Moisture content       | Dry product (< 5 % moisture content)     |
| Powder weight fraction | 1                                        |

*Activity emission potential*

|                   |                                 |
|-------------------|---------------------------------|
| Activity class    | Falling powders                 |
| Situation         | Transferring 10 – 100 kg/minute |
| Handling type     | Routine transfer                |
| Drop height       | Drop height > 0.5 m             |
| Containment level | Open process                    |

*Surface contamination*

|                                            |     |
|--------------------------------------------|-----|
| Process fully enclosed?                    | No  |
| Effective housekeeping practices in place? | Yes |

*Dispersion*

|           |                     |
|-----------|---------------------|
| Work area | Indoors             |
| Room size | 3000 m <sup>3</sup> |

*Risk Management Measures*

*Localised controls*

|           |                                          |
|-----------|------------------------------------------|
| Primary   | No localized controls (0.00 % reduction) |
| Secondary | No localized controls (0.00 % reduction) |

*Dispersion*

|                  |                              |
|------------------|------------------------------|
| Ventilation rate | 3 air changes per hour (ACH) |
|------------------|------------------------------|

## Predicted exposure levels

ART predicts air concentrations in a worker's personal breathing zone outside of any Respiratory Protection Equipment (RPE). The use of RPE must be considered separately.

### Mechanistic model results

The predicted 75th percentile full-shift exposure is 2.7 mg/m<sup>3</sup>.

The inter-quartile confidence interval is 1.4 mg/m<sup>3</sup> to 5.1 mg/m<sup>3</sup>.

# ART REPORT 8 – SB Satin Tone – 06-Aug-14

## Pouring process

### Chemical details

|          |            |
|----------|------------|
| Chemical | Satin Tone |
| CAS No.  |            |

### Scenario details

|                           |    |
|---------------------------|----|
| Number of activities      | 1  |
| Total duration (mins)     | 31 |
| Nonexposure period (mins) | 0  |

### Metadata

|                  |                        |
|------------------|------------------------|
| ART version      | 1.5                    |
| Creator          | joonas.koivisto@ttl.fi |
| Date created     | 15-Jul-14              |
| Date last edited | 06-Aug-14              |

Details for Activity SB 407 kg Satintone

Emission sources:      Near field   
                                  Far field

Duration (mins):                      31

Near-field exposure

*Operational Conditions*

*Substance emission potential*

|                        |                                          |
|------------------------|------------------------------------------|
| Substance product type | Powders, granules or pelletised material |
| Dustiness              | 2.44 mg/kg for inhalable fraction        |
| Moisture content       | Dry product (< 5 % moisture content)     |
| Powder weight fraction | 1                                        |

*Activity emission potential*

|                   |                                 |
|-------------------|---------------------------------|
| Activity class    | Falling powders                 |
| Situation         | Transferring 10 – 100 kg/minute |
| Handling type     | Routine transfer                |
| Drop height       | Drop height > 0.5 m             |
| Containment level | Open process                    |

*Surface contamination*

|                                            |     |
|--------------------------------------------|-----|
| Process fully enclosed?                    | No  |
| Effective housekeeping practices in place? | Yes |

*Dispersion*

|           |                     |
|-----------|---------------------|
| Work area | Indoors             |
| Room size | 3000 m <sup>3</sup> |

*Risk Management Measures*

*Localised controls*

|           |                                          |
|-----------|------------------------------------------|
| Primary   | No localized controls (0.00 % reduction) |
| Secondary | No localized controls (0.00 % reduction) |

*Dispersion*

|                  |                              |
|------------------|------------------------------|
| Ventilation rate | 3 air changes per hour (ACH) |
|------------------|------------------------------|

## Predicted exposure levels

ART predicts air concentrations in a worker's personal breathing zone outside of any Respiratory Protection Equipment (RPE). The use of RPE must be considered separately.

### Mechanistic model results

The predicted 75th percentile full-shift exposure is 2.7 mg/m<sup>3</sup>.

The inter-quartile confidence interval is 1.4 mg/m<sup>3</sup> to 5.2 mg/m<sup>3</sup>.

# ART REPORT 9 – SB Microdol – 06-Aug-14

## Pouring process

### Chemical details

|          |          |
|----------|----------|
| Chemical | Microdol |
| CAS No.  |          |

### Scenario details

|                           |    |
|---------------------------|----|
| Number of activities      | 1  |
| Total duration (mins)     | 10 |
| Nonexposure period (mins) | 0  |

### Metadata

|                  |                        |
|------------------|------------------------|
| ART version      | 1.5                    |
| Creator          | joonas.koivisto@ttl.fi |
| Date created     | 15-Jul-14              |
| Date last edited | 06-Aug-14              |

Details for Activity SB 275 kg Microdol

Emission sources:      Near field    
                                  Far field

Duration (mins):                      10

Near-field exposure

*Operational Conditions*

*Substance emission potential*

|                        |                                          |
|------------------------|------------------------------------------|
| Substance product type | Powders, granules or pelletised material |
| Dustiness              | 12.131 mg/kg for inhalable fraction      |
| Moisture content       | Dry product (< 5 % moisture content)     |
| Powder weight fraction | 1                                        |

*Activity emission potential*

|                   |                                 |
|-------------------|---------------------------------|
| Activity class    | Falling powders                 |
| Situation         | Transferring 10 – 100 kg/minute |
| Handling type     | Routine transfer                |
| Drop height       | Drop height > 0.5 m             |
| Containment level | Open process                    |

*Surface contamination*

|                                            |     |
|--------------------------------------------|-----|
| Process fully enclosed?                    | No  |
| Effective housekeeping practices in place? | Yes |

*Dispersion*

|           |                     |
|-----------|---------------------|
| Work area | Indoors             |
| Room size | 3000 m <sup>3</sup> |

*Risk Management Measures*

*Localised controls*

|           |                                          |
|-----------|------------------------------------------|
| Primary   | No localized controls (0.00 % reduction) |
| Secondary | No localized controls (0.00 % reduction) |

*Dispersion*

|                  |                              |
|------------------|------------------------------|
| Ventilation rate | 3 air changes per hour (ACH) |
|------------------|------------------------------|

## Predicted exposure levels

ART predicts air concentrations in a worker's personal breathing zone outside of any Respiratory Protection Equipment (RPE). The use of RPE must be considered separately.

### Mechanistic model results

The predicted 75th percentile full-shift exposure is 2.7 mg/m<sup>3</sup>.

The inter-quartile confidence interval is 1.4 mg/m<sup>3</sup> to 5.1 mg/m<sup>3</sup>.
